# Supplementary material for: Influenza B virus has global ordered RNA structure in (+) and (−) strands but relatively less stable predicted RNA folding free energy than allowed by the encoded protein sequence
Source: PubMed Central journal article supplement (PMC3765861; doi:10.1186/1756-0500-6-330), 2013-08-19

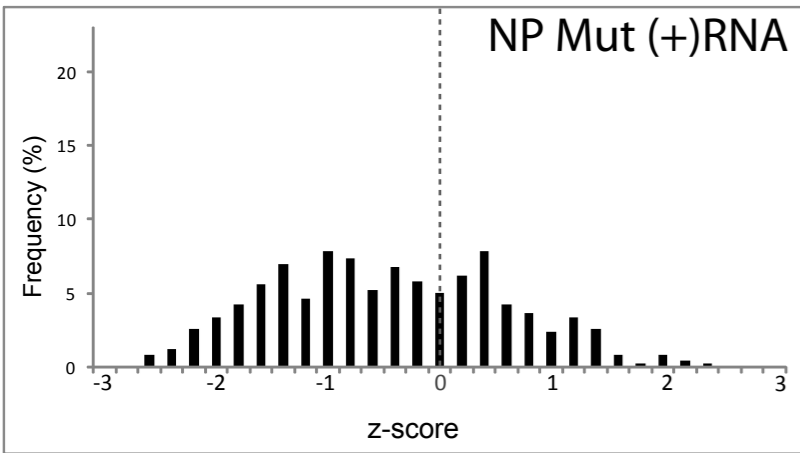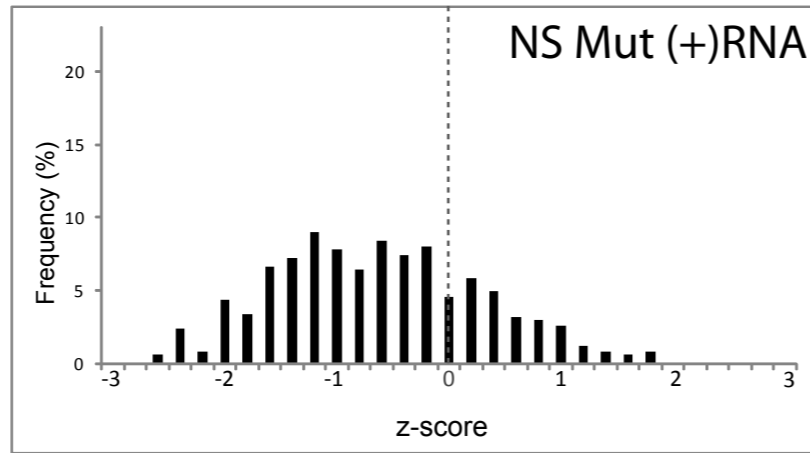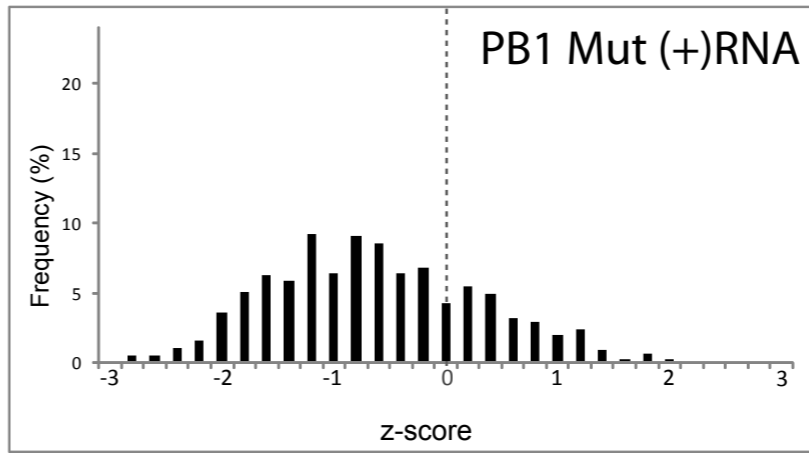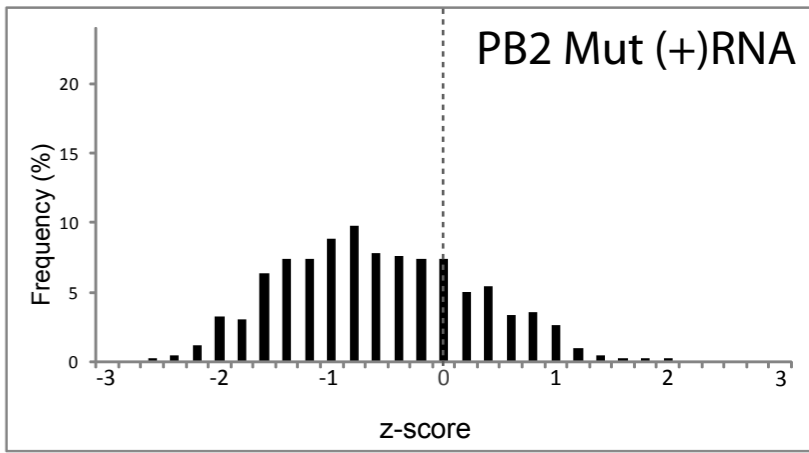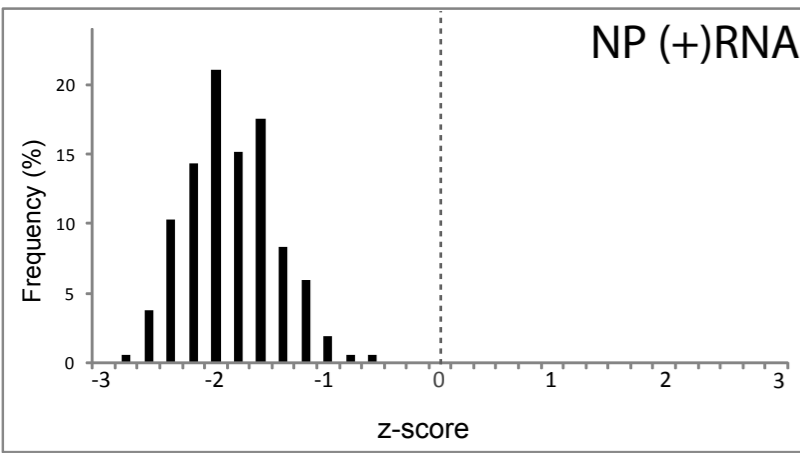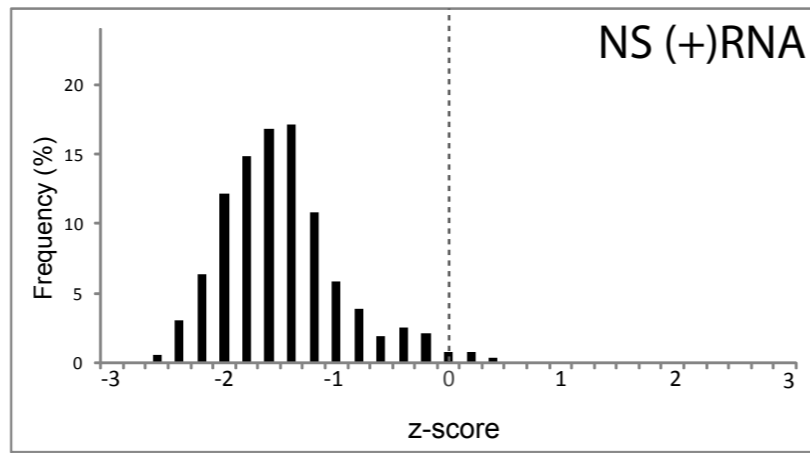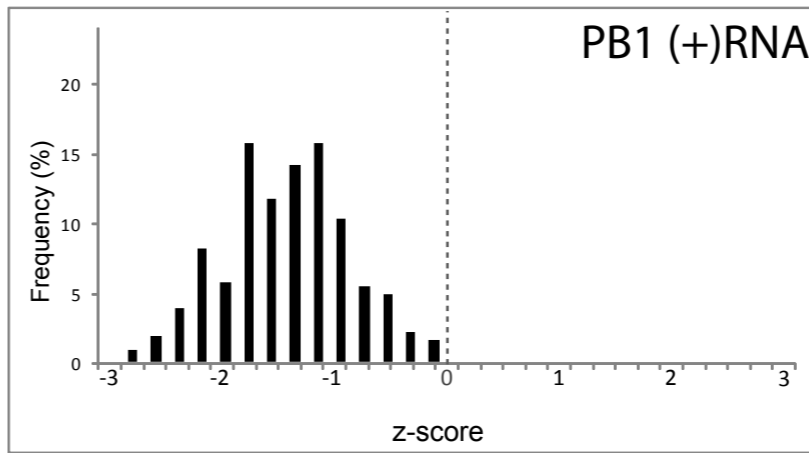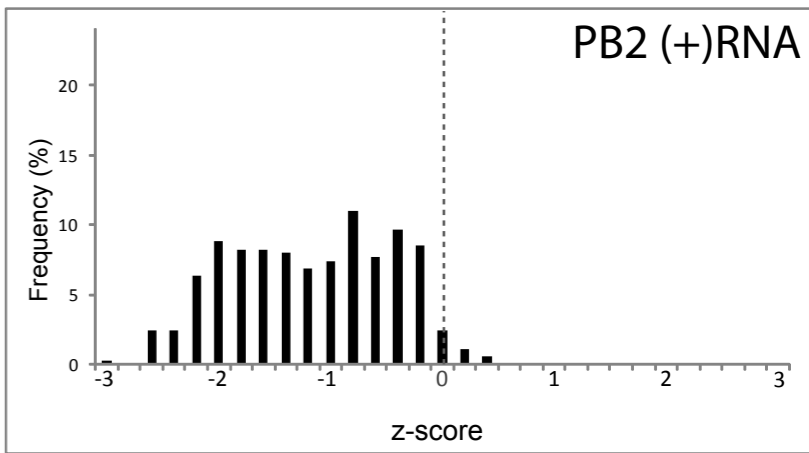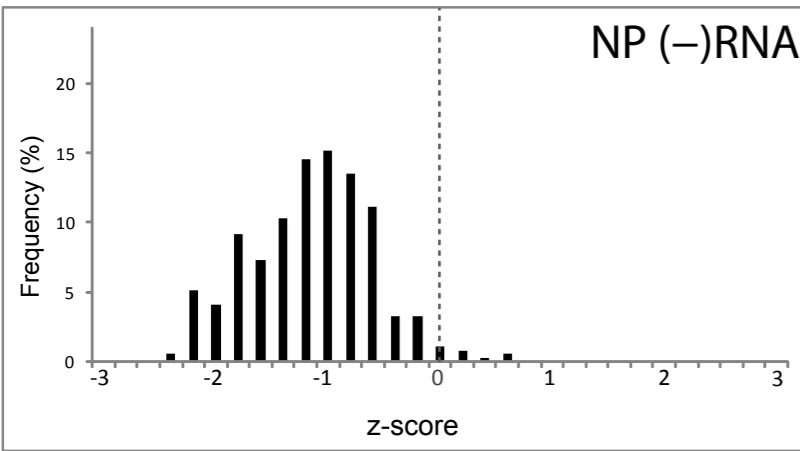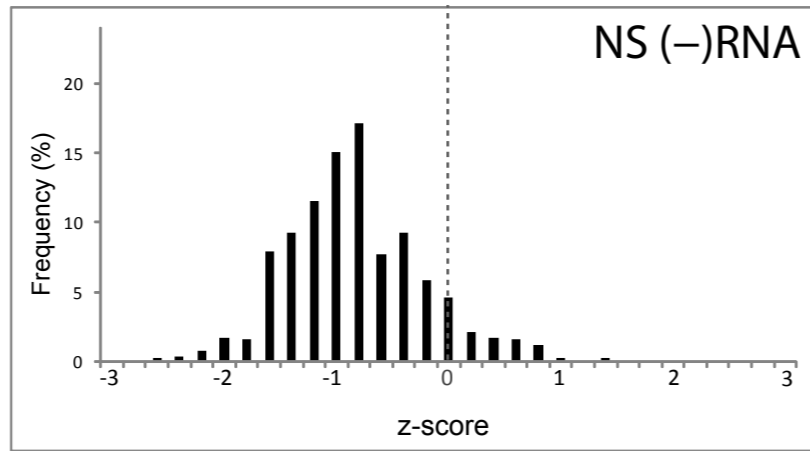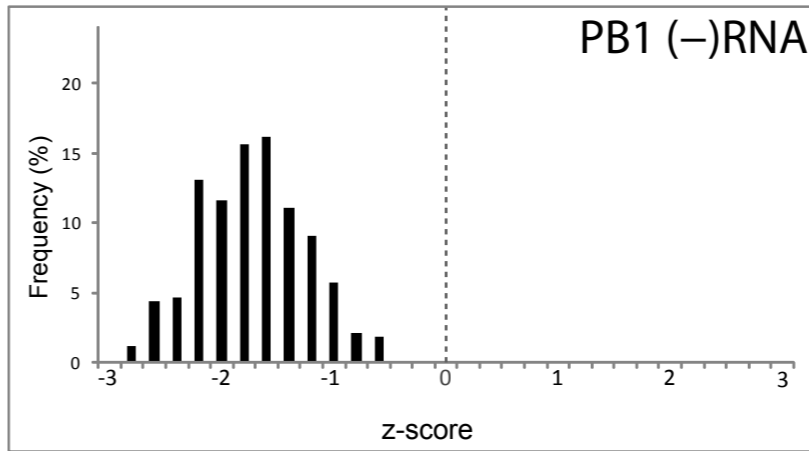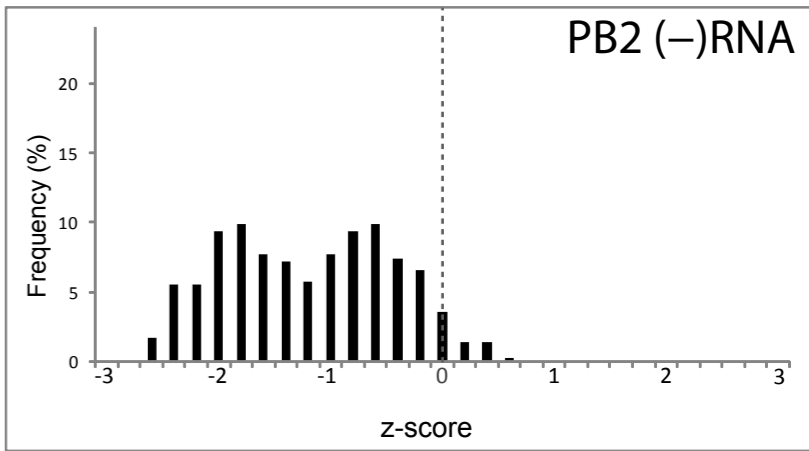

Supplement: 1756-0500-6-330-S1.pdf [file 1756-0500-6-330-S1.pdf]
